# Supplementary material
Source: PubMed Central journal article supplement (PMC2846601)
Supplement: NIHMS183124-supplement-1.pdf [file NIHMS183124-supplement-1.pdf]

## Supporting Information

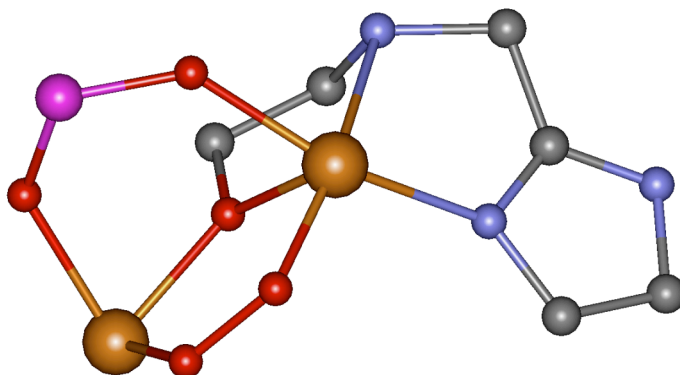

**Figure S1.** FEFF models for  $2\bullet\text{O}_2\text{PPh}_2$  and  $2\bullet\text{O}_2\text{AsMe}_2$ , based on combination of crystal structures of  $1\bullet\text{O}_2\text{PPh}_2$ ,  $1\bullet\text{O}_2\text{AsMe}_2$  and  $[\text{Fe}_2(\text{N-EtHPTB})(\text{O}_2)(\text{OPPh}_3)_2]^{3+}$  (Dong *et al.*)<sup>1</sup> using Accelrys DS Visualizer 1.7 and ChemBio 3D Ultra 11.0. Black = C, Blue = N, Red = O, Brown = Fe, Pink = P/As.

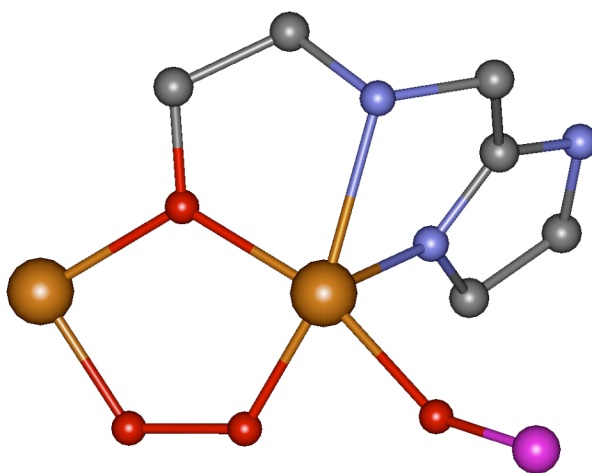

**Figure S2.** FEFF model for  $3\bullet\text{O}_2\text{PPh}_2$ , based on crystal structures of  $[\text{Fe}_2(\text{N-EtHPTB})(\text{O}_2)(\text{OPPh}_3)_2]^{3+}$  (Dong *et al.*)<sup>1</sup> using Accelrys DS Visualizer 1.7 and ChemBio 3D Ultra 11.0. Black = C, Blue = N, Red = O, Brown = Fe, Pink = P.

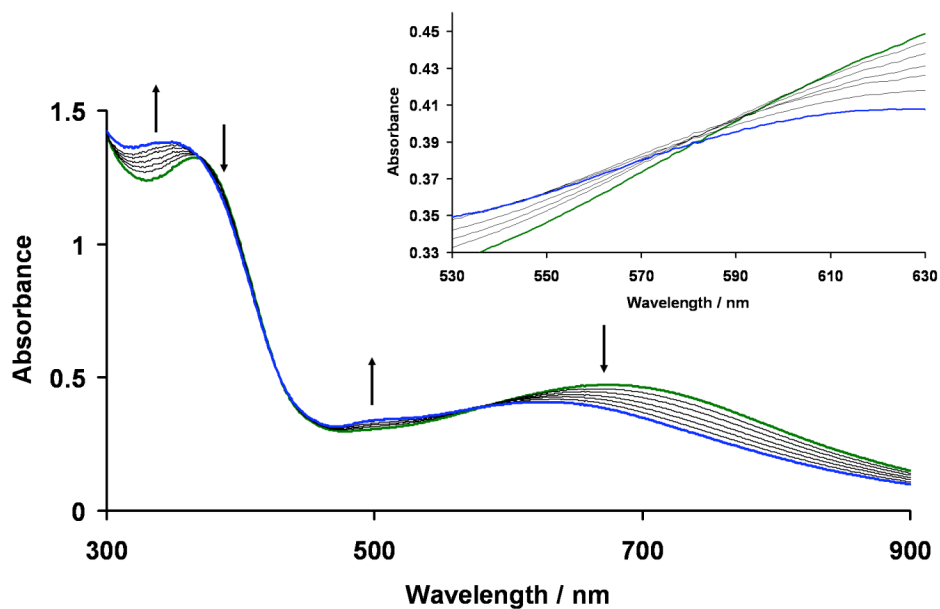

**Figure S3.** Partial conversion of a 0.5 mM solution of  $2\bullet\text{O}_2\text{PPh}_2$  to  $3\bullet\text{O}_2\text{PPh}_2$  in  $\text{CH}_2\text{Cl}_2$  in a 0.5 cm cuvette at  $-30\text{ }^\circ\text{C}$ . The inset reveals the pseudo-isosbestic point at  $\sim 580\text{ nm}$ .

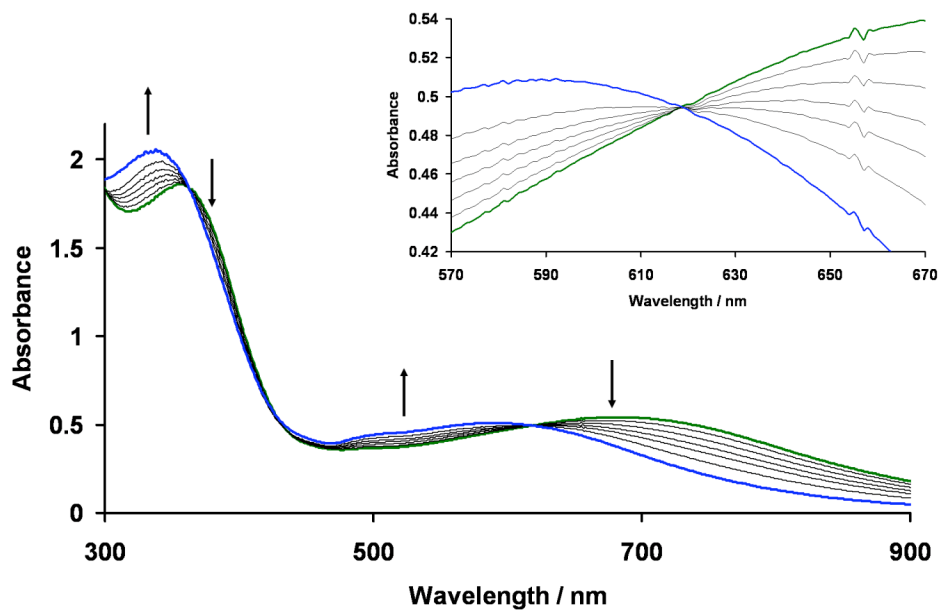

**Figure S4.** Conversion of a 0.5 mM solution of  $2\bullet\text{O}_2\text{PPh}_2$  to  $3\bullet\text{O}_2\text{PPh}_2$  in MeCN in a 0.5 cm cuvette at  $-30\text{ }^\circ\text{C}$ . The inset reveals the isosbestic point at  $\sim 620\text{ nm}$ .

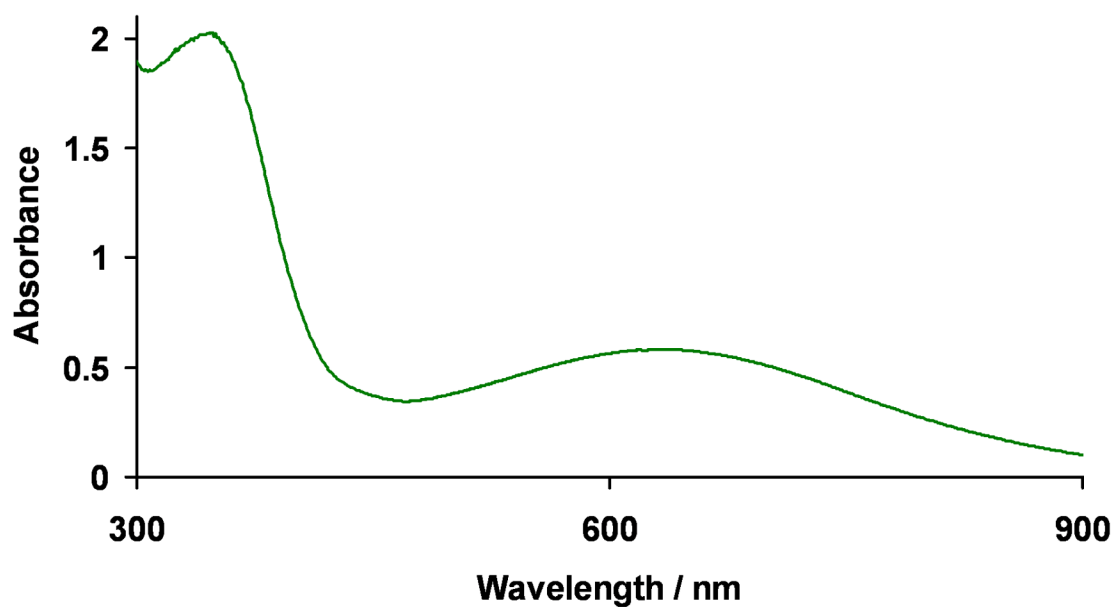

**Figure S5.** UV-Vis spectrum of a 0.5 mM solution of  $2\bullet\text{O}_2\text{AsMe}_2$  in MeCN in a 0.5 cm cuvette at  $-40\text{ }^\circ\text{C}$ .

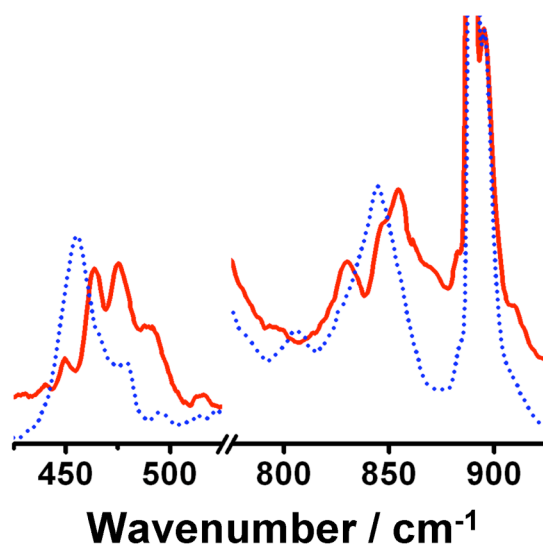

**Figure S6.** Resonance Raman spectra of frozen solutions of  $3\bullet\text{O}_2\text{PPh}_2$  in  $\text{CH}_2\text{Cl}_2$ . Samples are contaminated with  $2\bullet\text{O}_2\text{PPh}_2$ . Solid-red =  $^{16}\text{O}_2$ . Dotted-blue =  $^{18}\text{O}_2$ .

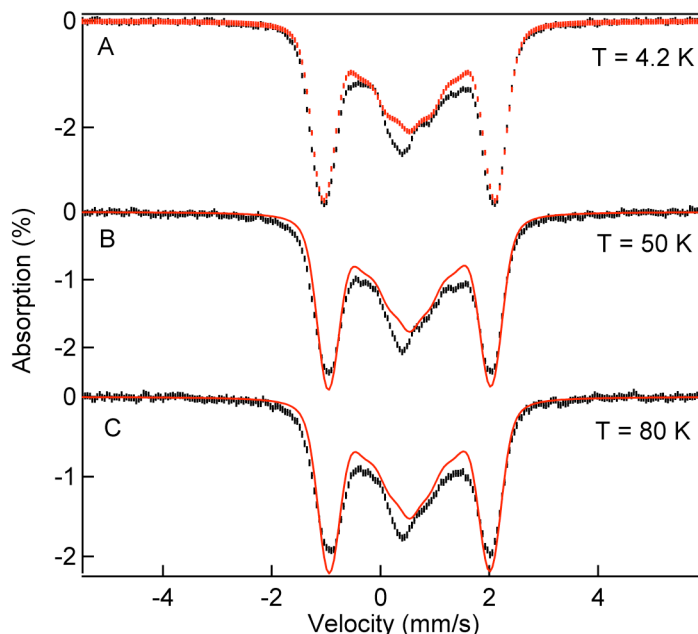

**Figure S7.** 8.0T Mössbauer spectra of  $3\bullet\text{O}_2\text{PPh}_2$  in MeCN recorded at 4.2 K (A) and 50 K (B) and 80 K (C). The solid lines are theoretical curves using the parameters listed in Table 3. The solid line in (B) was obtained for  $J = 60 \text{ cm}^{-1}$ .

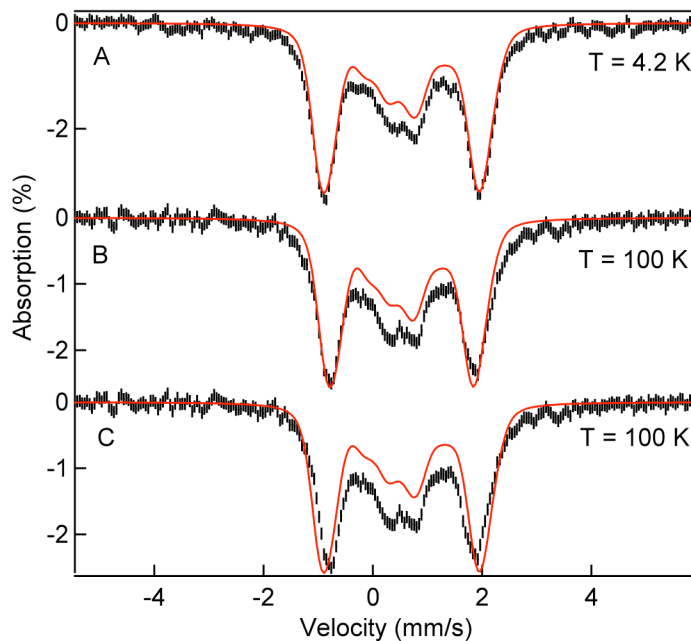

**Figure S8.** 8.0T Mössbauer spectra of  $3\bullet\text{O}_2\text{PPh}_2$  in  $\text{CH}_2\text{Cl}_2$  recorded at 4.2 K (A) and 100 K (B). The solid lines are theoretical curves using the parameters listed in Table 3. The data in (C) are the same as in (B); the solid line in (C) is a simulation obtained by assuming that only the  $S = 0$  ground state is occupied at 100 K, i. e. using  $J = 1000 \text{ cm}^{-1}$ . The solid line in (B) was obtained for  $J = 60 \text{ cm}^{-1}$ .

**Table S1.** EXAFS fitting results for **2•O<sub>2</sub>PPh<sub>2</sub>**, **2•O<sub>2</sub>AsMe<sub>2</sub>**, and **3•O<sub>2</sub>PPh<sub>2</sub>**.<sup>a</sup>

| Complex                                | Fit      | Fe-O/N      |             |                | Fe-O/N      |             |                | Fe-O/N      |                         |                | Fe...C      |             |                | Fe...X      |                         |                | F <sup>c</sup> | F <sup>d</sup> |
|----------------------------------------|----------|-------------|-------------|----------------|-------------|-------------|----------------|-------------|-------------------------|----------------|-------------|-------------|----------------|-------------|-------------------------|----------------|----------------|----------------|
|                                        |          | N           | R           | σ <sup>2</sup> | N           | R           | σ <sup>2</sup> | N           | R                       | σ <sup>2</sup> | N           | R           | σ <sup>2</sup> | N           | R                       | σ <sup>2</sup> |                |                |
| <b>2•O<sub>2</sub>PPh<sub>2</sub></b>  | 1        | 6           | 1.97        | 11.37          |             |             |                |             |                         |                |             |             |                |             |                         |                | 1.384          | 0.117          |
|                                        | 2        | 5           | 2.00        | 8.64           | 1           | 2.30        | 1.13           |             |                         |                |             |             |                |             |                         |                | 1.225          | 0.104          |
|                                        | 3        | 4           | 2.00        | 6.23           | 1           | 2.29        | 2.92           |             |                         |                | 5           | 2.99        | 1.98           |             |                         |                | 0.799          | 0.052          |
|                                        | 4        | 4           | 2.00        | 6.32           | 1           | 2.29        | 2.00           |             |                         |                | 5           | 2.98        | 3.84           | 1Fe         | 3.27                    | 3.59           | 0.601          | 0.035          |
|                                        | 5        | 4           | 1.99        | 6.14           | 1           | 2.29        | 3.31           |             |                         |                | 5           | 2.94        | 10.66          | 1P          | 3.12                    | -0.30          | 0.488          | 0.023          |
|                                        | 6        | 4           | 2.00        | 6.54           | 1           | 2.31        | 3.64           |             |                         |                | 5           | 2.99        | 2.19           | 5C          | 2.21                    | 2.26           | 0.662          | 0.042          |
|                                        | 7        | 4           | 1.99        | 6.22           | 1           | 2.29        | 2.50           |             |                         |                | 5           | 2.95        | 9.28           | 1Fe         | 3.24                    | 9.60           | 0.430          | 0.022          |
|                                        |          |             |             |                |             |             |                |             |                         |                |             |             |                | 1P          | 3.12                    | 0.00           |                |                |
|                                        | 8        | 4           | 2.00        | 6.69           | 1           | 2.31        | 2.71           | 1           | 2.54                    | 0.58           | 5           | 2.99        | 3.55           | 1Fe         | 3.28                    | 3.18           | 0.392          | 0.018          |
| <b>9</b>                               | <b>4</b> | <b>2.00</b> | <b>6.57</b> | <b>1</b>       | <b>2.30</b> | <b>1.50</b> | <b>1</b>       | <b>2.51</b> | <b>3.00<sup>b</sup></b> | <b>5</b>       | <b>2.96</b> | <b>7.95</b> | <b>1Fe</b>     | <b>3.25</b> | <b>4.06</b>             | <b>0.304</b>   | <b>0.013</b>   |                |
|                                        |          |             |             |                |             |             |                |             |                         |                |             |             | <b>1P</b>      | <b>3.14</b> | <b>3.00<sup>b</sup></b> |                |                |                |
| <b>2•O<sub>2</sub>AsMe<sub>2</sub></b> | 1        | 6           | 1.94        | 14.63          |             |             |                |             |                         |                |             |             |                |             |                         |                | 1.517          | 0.149          |
|                                        | 2        | 5           | 1.97        | 10.13          | 1           | 2.26        | 1.35           |             |                         |                |             |             |                |             |                         |                | 1.368          | 0.140          |
|                                        | 3        | 5           | 1.99        | 10.86          | 1           | 2.25        | 0.12           |             |                         |                | 3           | 2.97        | -1.00          |             |                         |                | 1.091          | 0.104          |
|                                        | 4        | 5           | 1.97        | 10.82          | 1           | 2.25        | 2.19           |             |                         |                | 3           | 2.93        | 3.86           | 1Fe         | 3.25                    | 0.98           | 0.611          | 0.040          |
|                                        | 5        | 5           | 1.97        | 10.95          | 1           | 2.26        | 2.85           |             |                         |                | 3           | 2.90        | 7.46           | 1As         | 3.19                    | 1.94           | 0.595          | 0.038          |
|                                        | 6        | 5           | 1.97        | 10.66          | 1           | 2.25        | 1.03           |             |                         |                | 3           | 2.95        | 1.63           | 6C          | 3.28                    | 0.40           | 0.809          | 0.079          |
|                                        | 7        | <b>3</b>    | <b>1.97</b> | <b>3.94</b>    | <b>2</b>    | <b>2.17</b> | <b>4.28</b>    | <b>1</b>    | <b>2.35</b>             | <b>5.35</b>    | <b>3</b>    | <b>2.94</b> | <b>2.76</b>    | <b>1Fe</b>  | <b>3.27</b>             | <b>1.24</b>    | <b>0.381</b>   | <b>0.018</b>   |
|                                        | <b>8</b> | <b>3</b>    | <b>1.97</b> | <b>3.87</b>    | <b>2</b>    | <b>2.17</b> | <b>3.82</b>    | <b>1</b>    | <b>2.36</b>             | <b>3.80</b>    | <b>3</b>    | <b>2.93</b> | <b>5.20</b>    | <b>1As</b>  | <b>3.21</b>             | <b>2.24</b>    | <b>0.369</b>   | <b>0.019</b>   |
|                                        | 9        | 3           | 1.97        | 3.85           | 2           | 2.17        | 3.89           | 1           | 2.35                    | 4.24           | 3           | 2.92        | 3.34           | 1Fe         | 3.13                    | 19.43          | 0.344          | 0.022          |
|                                        | 10       | 3           | 1.97        | 3.84           | 2           | 2.17        | 3.90           | 1           | 2.36                    | 4.71           | 3           | 2.94        | 2.22           | 1As         | 3.21                    | 1.97           |                |                |
|                                        |          |             |             |                |             |             |                |             |                         |                |             |             | 1Fe            | 3.27        | 1.02                    | 0.316          | 0.019          |                |
|                                        |          |             |             |                |             |             |                |             |                         |                |             |             | 1As            | 3.45        | 12.71                   |                |                |                |
| <b>3•O<sub>2</sub>PPh<sub>2</sub></b>  | 1        | 6           | 1.98        | 14.22          |             |             |                |             |                         |                |             |             |                |             |                         |                | 1.200          | 0.081          |
|                                        | 2        | 5           | 2.00        | 7.84           |             |             |                | 1           | 1.84                    | 1.30           |             |             |                |             |                         |                | 1.143          | 0.083          |
|                                        | 3        | 5           | 2.00        | 11.17          | 1           | 2.34        | 0.34           |             |                         |                |             |             |                |             |                         |                | 0.976          | 0.061          |
|                                        | 4        | 4           | 2.03        | 5.68           | 1           | 2.34        | 1.01           | 1           | 1.87                    | 1.16           |             |             |                |             |                         |                | 0.914          | 0.061          |
|                                        | 5        | 4           | 2.03        | 5.64           | 1           | 2.34        | 0.42           | 1           | 1.88                    | 1.14           | 4           | 2.96        | 2.20           |             |                         |                | 0.568          | 0.028          |
|                                        | <b>6</b> | <b>4</b>    | <b>2.04</b> | <b>5.73</b>    | <b>1</b>    | <b>2.33</b> | <b>0.48</b>    | <b>1</b>    | <b>1.88</b>             | <b>1.23</b>    | <b>4</b>    | <b>2.95</b> | <b>2.39</b>    | <b>1Fe</b>  | <b>3.47</b>             | <b>4.59</b>    | <b>0.366</b>   | <b>0.012</b>   |
|                                        | 7        | 4           | 2.04        | 5.74           | 1           | 2.33        | 0.52           | 1           | 1.88                    | 1.28           | 4           | 2.95        | 2.30           | 1P          | 3.61                    | 1.50           | 0.452          | 0.018          |
|                                        | 8        | 4           | 2.03        | 5.73           | 1           | 2.33        | 0.67           | 1           | 1.88                    | 1.24           | 4           | 2.95        | 2.63           | 5C          | 3.50                    | 2.99           | 0.494          | 0.021          |
|                                        | 9        | 4           | 2.04        | 5.58           | 1           | 2.33        | 0.80           | 1           | 1.88                    | 1.12           | 4           | 2.95        | 2.43           | 1Fe         | 3.44                    | 3.73           | 0.332          | 0.011          |
|                                        |          |             |             |                |             |             |                |             |                         |                |             |             | 0.5P           | 3.39        | 0.69                    |                |                |                |

<sup>a</sup> Resolution ~ 0.12 Å for **2•O<sub>2</sub>PPh<sub>2</sub>** and **3•O<sub>2</sub>PPh<sub>2</sub>** and ~ 0.14 Å for **2•O<sub>2</sub>AsMe<sub>2</sub>**; σ<sup>2</sup> = respective Debye-Waller factor in units of 10<sup>-3</sup> Å<sup>2</sup>.

<sup>b</sup> σ<sup>2</sup> value held fixed during optimization.

<sup>c</sup> F = goodness of fit calculated as  $F = \sqrt{\sum k^6 (\div_{exp} - \div_{cal})^2 / N}$ , where N = the number of data points.<sup>2</sup>

<sup>d</sup> F' = F<sup>2</sup>/ν, where ν = n<sub>idp</sub> - n<sub>var</sub>, n<sub>idp</sub> is the number of independent points in each data set and n<sub>var</sub> is the number of variables used in each optimization step. F' is used to indicate the improvement of fit upon the introduction of a shell.<sup>2</sup>

The  $\sigma^2$  values of the Fe...Fe path (1.24) and the Fe...As path (2.24) in  $2\bullet\text{O}_2\text{AsMe}_2$  (Fits 7 and 8, respectively) are significantly smaller than the  $\sigma^2$  value of 4.06 found for the Fe...Fe paths in  $2\bullet\text{O}_2\text{PPh}_2$  (Fit 9). Smaller  $\sigma^2$  leads to larger calculated amplitudes of Fe...Fe or Fe...As peaks in  $2\bullet\text{O}_2\text{AsMe}_2$  as compared to the Fe...Fe path in  $2\bullet\text{O}_2\text{PPh}_2$  (Figure S9). In fact, two Fe...Fe/As paths can also lead a good simulation of data in the k-range of 8 to 13  $\text{\AA}^{-1}$  (Figure S10).

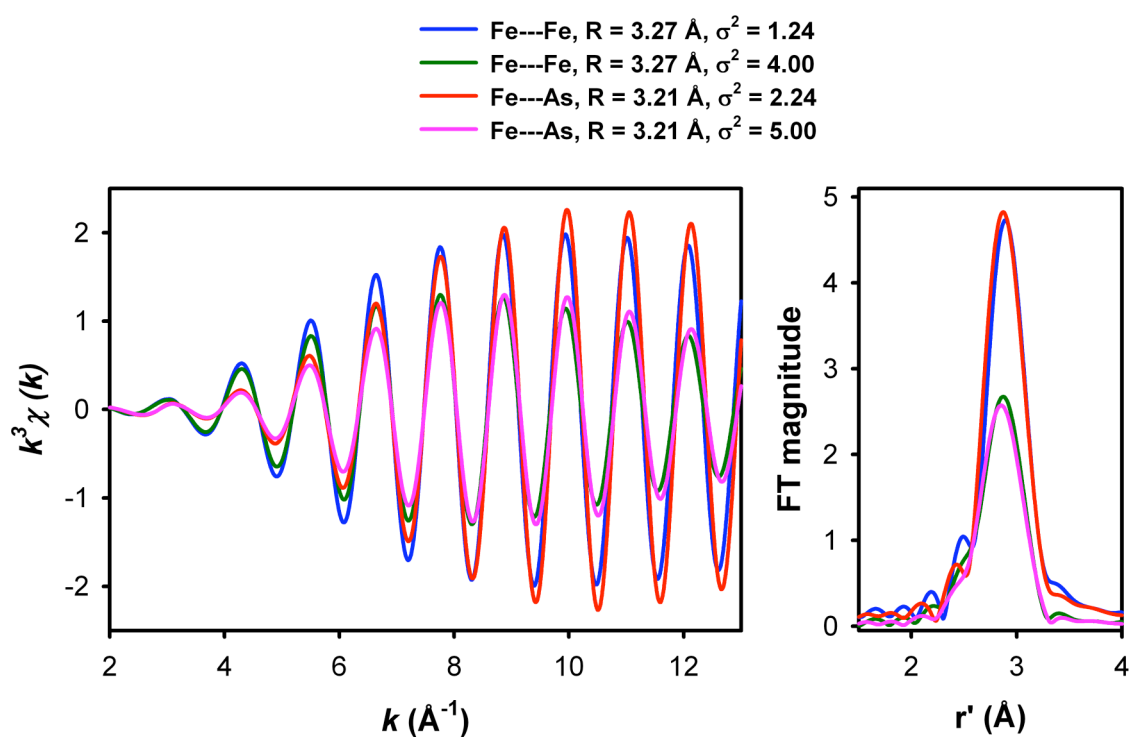

**Figure S9.** Theoretical EXAFS amplitudes and phases and FT amplitudes at different  $\sigma^2$  values using FEFF84\_87<sup>3,4</sup> and Artemis.<sup>5</sup>

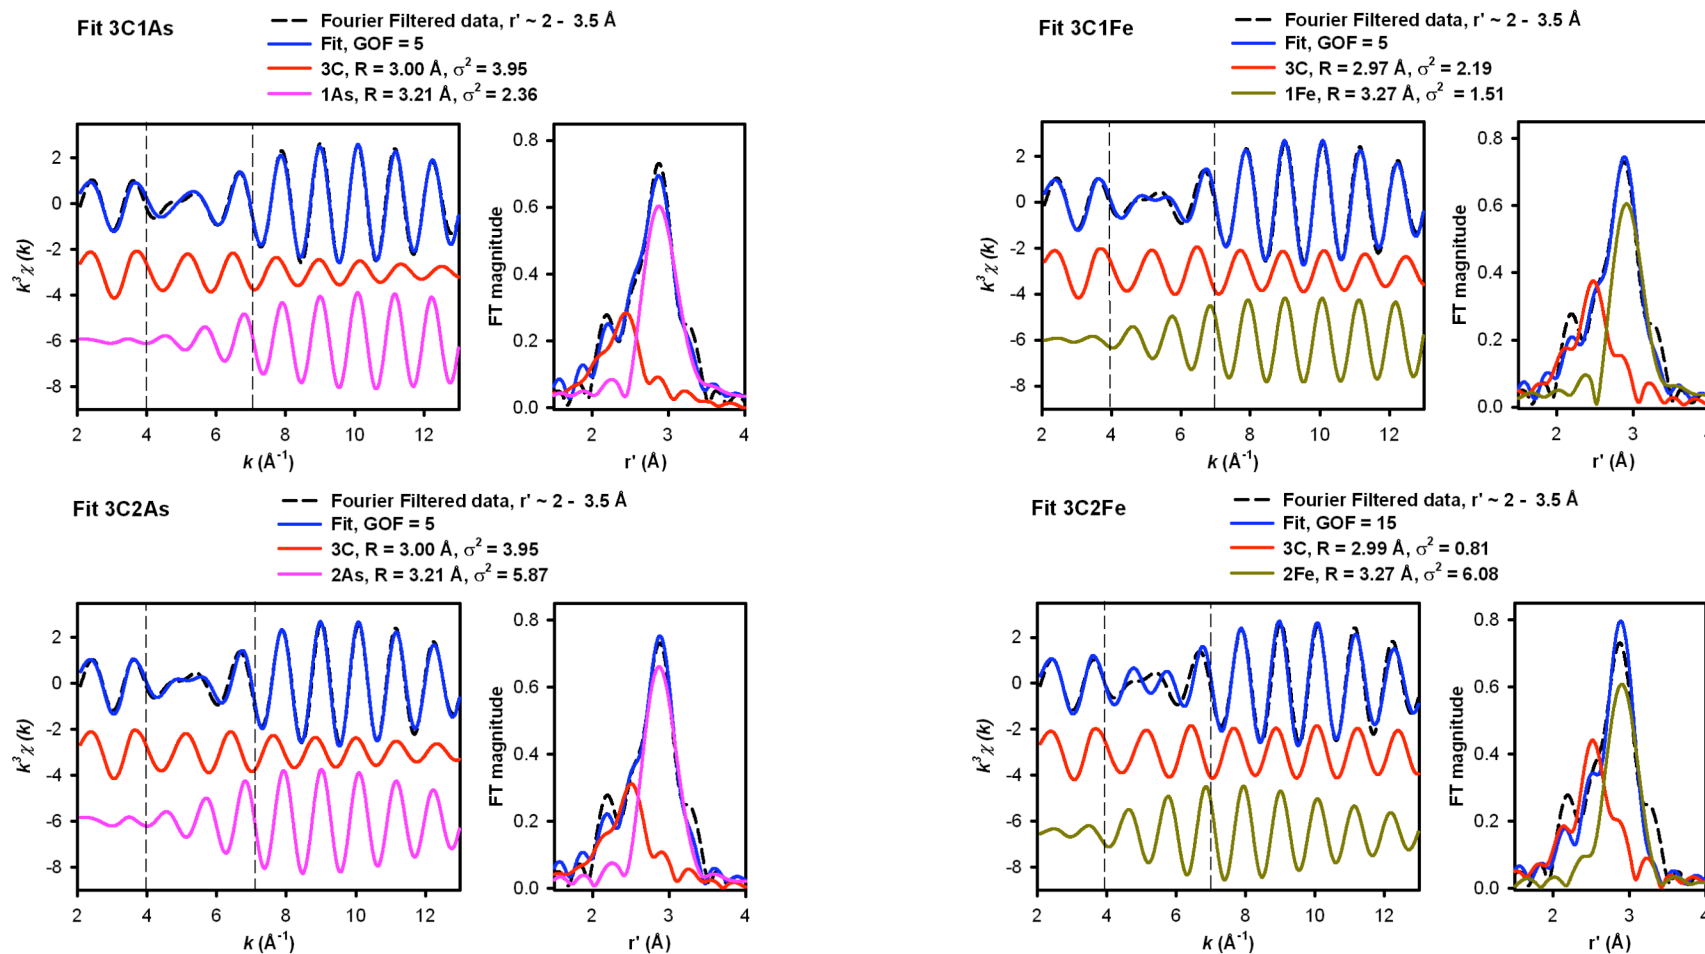

**Figure S10.** Fits to the outer shell with three Fe...C and one (3C1Fe, 3C1As) or two (3C2Fe, 3C2As) Fe...Fe/As paths. Fits 3C1Fe, 3C1As, and 3C2As are equally good. In fit 3C2Fe, the feature corresponding to the high Z scatterers is also well fitted. However, the destructive effect of two Fe...Fe paths on the 3 Fe...C paths in the range of  $4$  to  $7 \text{ \AA}^{-1}$  results in a lower quality of fit for 3C2Fe.

- (1) Dong, Y.; Yan, S.; Young, V. G., Jr.; Que, L., Jr. *Angew. Chem. Int. Ed. Engl.* **1996**, *35*, 618-620.
- (2) Riggs-Gelasco, P. J.; Stemmler, T. L.; Penner-Hahn, J. E. *Coord. Chem. Rev.* **1995**, *144*, 245-286.
- (3) Rehr, J. J.; Mustre de Leon, J.; Zabinsky, S. I.; Albers, R. C. *J. Am. Chem. Soc.* **1991**, *113*, 5135-5140.
- (4) Leon, J. M. d.; Rehr, J. J.; Zabinsky, S. I.; Albers, R. C. *Phys. Rev. B* **1991**, *44*, 4146-4156.
- (5) Ravel, B.; Newville, M. *J. Synchrotron Rad.* **2005**, *12*, 537-541.
